# Supplementary material
Source: HighWire-hosted journal article supplement (http://ajnr-stage2.highwire.org/highwire/filestream/107893/field_highwire_adjunct_files/0/1033.pdf)
Supplement: 1033.pdf [file 1033.pdf]

## Online Supplemental Data

Timing of spot sign appearance, spot sign volume, and leakage rate between phases of mCTA predicts intracerebral hemorrhage growth

MacKenzie Horn, Ericka Teleg, Koji Tanaka, Abdulaziz Sulaiman Al. Sultan, Linda Kasickova, Tomoyuki Ohara, Piyush Ojha, Sanchea Wasyliv, Sina Marzoughi, Ankur Banerjee, Girish Kulkarni, Kennedy Horn, Amy Bobyn, Anneliese Neweduk, Nishita Singh, Wu Qiu, David Rodriguez-Luna, Dar Dowlathshahi, Mayank Goyal, Bijoy K. Menon, and Andrew M. Demchuk

### Contents

**Table S1a.** Logistic regression of clinical variables for hematoma growth

**Table S1b.** Logistic regression of imaging variables for hematoma growth

**Table S2a.** Logistic regression analysis for >12.5 mL hematoma growth

**Table S2b.** Logistic regression analysis for >33% hematoma growth

**Table S3a.** Logistic regression analysis in patients underwent mCTA ICH protocol

**Table S3b.** Logistic regression analysis in patients underwent follow up imaging by CT

**Table S4.** Logistic regression analysis of spot sign parameters for mRS  $\geq 3$  at 90 days

**Figure S1.** The frequency of hematoma growth by spot sign parameter

**Table S1a.** Logistic regression of clinical variables for hematoma growth\*

| Variable                                     | OR (95% CI)      | <i>P</i> value |
|----------------------------------------------|------------------|----------------|
| History of stroke                            | 3.31 (1.10-9.83) | 0.033          |
| NIHSS at presentation (per 1-point increase) | 1.10 (1.05-1.16) | <0.001         |
| Onset-to-CT time (per 10-min increase)       | 0.98 (0.95-1.00) | 0.013          |

\*Hematoma growth is defined as >6 mL increase in volume of hematoma from baseline.

**Table S1b.** Logistic regression of imaging variables for hematoma growth\*

| Variable                                | OR (95% CI)      | <i>P</i> value |
|-----------------------------------------|------------------|----------------|
| Baseline ICH volume (per 1-mL increase) | 1.02 (1.01-1.05) | <0.001         |

\*Hematoma growth is defined as >6 mL increase in volume of hematoma from baseline.

Abbreviations: ICH, intracerebral hemorrhage.

**Table S2a.** Logistic regression analysis for >12.5 mL hematoma growth\*

|                                                                              | OR (95% CI)      | P value | C-Statistic | BIC   | AIC   |
|------------------------------------------------------------------------------|------------------|---------|-------------|-------|-------|
| <b>Model 1</b>                                                               |                  |         | 0.748       | 162.1 | 155.4 |
| No spot sign in the first phase (reference)                                  | 1.0              |         |             |       |       |
| Spot sign in the first phase                                                 | 10.6 (4.7–24.2)  | <0.001  |             |       |       |
| <b>Model 2</b>                                                               |                  |         | 0.810       | 156.8 | 146.6 |
| No spot sign (reference)                                                     | 1.0              |         |             |       |       |
| Spot sign first appearing in the first phase                                 | 19.1 (7.0–51.9)  | <0.001  |             |       |       |
| Spot sign first appearing in the second or third phase                       | 8.9 (2.6–30.8)   | 0.001   |             |       |       |
| <b>Model 3</b>                                                               |                  |         | 0.813       | 162.0 | 148.4 |
| No spot sign (reference)                                                     | 1.0              |         |             |       |       |
| Spot sign first appearing in the first phase with volume <19.7 $\mu$ L       | 16.9 (5.3–53.5)  | <0.001  |             |       |       |
| Spot sign first appearing in the first phase with volume $\geq$ 19.7 $\mu$ L | 21.7 (6.8–68.9)  | <0.001  |             |       |       |
| Spot sign first appearing in the second or third phase                       | 8.9 (2.6–30.8)   | 0.001   |             |       |       |
| <b>Model 4</b>                                                               |                  |         | 0.800       | 156.9 | 146.8 |
| No spot sign (reference)                                                     | 1.0              |         |             |       |       |
| Spot sign with positive leakage rate between phases                          | 11.8 (4.2–33.0)  | <0.001  |             |       |       |
| Spot sign with negative leakage rate between any phases                      | 23.7 (7.5–74.3)  | <0.001  |             |       |       |
| <b>Model 5<sup>†</sup></b>                                                   |                  |         | 0.703       | 94.5  | 90.0  |
| Absolute leakage rate (per 1- $\mu$ L/sec increase)                          | 1.18 (1.00–1.38) | 0.043   |             |       |       |

\*Hematoma growth is defined as >12.5 mL increase in volume of hematoma from baseline. <sup>†</sup>Model 5 includes only patients with spot sign (n = 69). Abbreviations: AIC, Akaike information criterion; BIC, Bayesian information criterion.

**Table S2b.** Logistic regression analysis for >33% hematoma growth\*

|                                                                              | OR (95% CI)      | P value | C-Statistic | BIC   | AIC   |
|------------------------------------------------------------------------------|------------------|---------|-------------|-------|-------|
| <b>Model 1</b>                                                               |                  |         | 0.728       | 182.0 | 175.2 |
| No spot sign in the first phase (reference)                                  | 1.0              |         |             |       |       |
| Spot sign in the first phase                                                 | 9.2 (4.3–19.9)   | <0.001  |             |       |       |
| <b>Model 2</b>                                                               |                  |         | 0.812       | 167.4 | 157.3 |
| No spot sign (reference)                                                     | 1.0              |         |             |       |       |
| Spot sign first appearing in the first phase                                 | 19.3 (7.5–49.9)  | <0.001  |             |       |       |
| Spot sign first appearing in the second or third phase                       | 13.9 (4.5–43.6)  | <0.001  |             |       |       |
| <b>Model 3</b>                                                               |                  |         | 0.824       | 170.2 | 156.7 |
| No spot sign (reference)                                                     | 1.0              |         |             |       |       |
| Spot sign first appearing in the first phase with volume <19.7 $\mu$ L       | 13.9 (4.5–43.6)  | <0.001  |             |       |       |
| Spot sign first appearing in the first phase with volume $\geq$ 19.7 $\mu$ L | 31.3 (10.1–97.0) | <0.001  |             |       |       |
| Spot sign first appearing in the second or third phase                       | 13.9 (4.5–45.4)  | <0.001  |             |       |       |
| <b>Model 4</b>                                                               |                  |         | 0.811       | 167.6 | 157.5 |
| No spot sign (reference)                                                     | 1.0              |         |             |       |       |
| Spot sign with positive leakage rate between phases                          | 16.1 (6.2–42.1)  | <0.001  |             |       |       |
| Spot sign with negative leakage rate between any phases                      | 20.1 (6.7–60.7)  | <0.001  |             |       |       |
| <b>Model 5<sup>†</sup></b>                                                   |                  |         | 0.666       | 99.2  | 94.8  |
| Absolute leakage rate (per 1- $\mu$ L/sec increase)                          | 1.14 (0.98–1.33) | 0.083   |             |       |       |

\*Hematoma growth is defined as >33% increase in volume of hematoma from baseline. <sup>†</sup>Model 5 includes only patients with spot sign (n = 69). Abbreviations: AIC, Akaike information criterion; BIC, Bayesian information criterion.

**Table S3a.** Logistic regression analysis in patients underwent mCTA ICH protocol

|                                                                              | OR (95% CI)      | P value | C-Statistic | BIC   | AIC   |
|------------------------------------------------------------------------------|------------------|---------|-------------|-------|-------|
| <b>Model 1</b>                                                               |                  |         | 0.712       | 167.2 | 160.8 |
| No spot sign in the first phase (reference)                                  | 1.0              |         |             |       |       |
| Spot sign in the first phase                                                 | 8.3 (3.7–18.6)   | <0.001  |             |       |       |
| <b>Model 2</b>                                                               |                  |         | 0.771       | 163.8 | 154.2 |
| No spot sign (reference)                                                     | 1.0              |         |             |       |       |
| Spot sign first appearing in the first phase                                 | 12.6 (5.1–31.1)  | <0.001  |             |       |       |
| Spot sign first appearing in the second or third phase                       | 5.8 (1.9–17.9)   | 0.002   |             |       |       |
| <b>Model 3</b>                                                               |                  |         | 0.781       | 165.7 | 153.0 |
| No spot sign (reference)                                                     | 1.0              |         |             |       |       |
| Spot sign first appearing in the first phase with volume <19.7 $\mu$ L       | 7.2 (2.4–21.7)   | <0.001  |             |       |       |
| Spot sign first appearing in the first phase with volume $\geq$ 19.7 $\mu$ L | 23.4 (7.3–75.0)  | <0.001  |             |       |       |
| Spot sign first appearing in the second or third phase                       | 5.8 (1.9–17.9)   | 0.002   |             |       |       |
| <b>Model 4</b>                                                               |                  |         | 0.776       | 161.8 | 152.3 |
| No spot sign (reference)                                                     | 1.0              |         |             |       |       |
| Spot sign with positive leakage rate between phases                          | 6.9 (2.8–17.0)   | <0.001  |             |       |       |
| Spot sign with negative leakage rate between any phases                      | 21.6 (6.7–69.9)  | <0.001  |             |       |       |
| <b>Model 5*</b>                                                              |                  |         | 0.684       | 87.6  | 83.3  |
| Absolute leakage rate (per 1- $\mu$ L/sec increase)                          | 1.21 (1.01–1.46) | 0.042   |             |       |       |

Only patients who underwent mCTA using ICH mCTA protocol (n = 177). Hematoma growth is defined as >6 mL increase in volume of hematoma from baseline. \*Model 5 includes only patients with spot sign (n = 59). Abbreviations: AIC, Akaike information criterion; BIC, Bayesian information criterion; ICH, intracerebral hemorrhage; mCTA, multiphase CTA.

**Table S3b.** Logistic regression analysis in patients underwent follow up imaging by CT

|                                                                              | OR (95% CI)      | P value | C-Statistic | BIC   | AIC   |
|------------------------------------------------------------------------------|------------------|---------|-------------|-------|-------|
| <b>Model 1</b>                                                               |                  |         | 0.705       | 166.2 | 160.1 |
| No spot sign in the first phase (reference)                                  | 1.0              |         |             |       |       |
| Spot sign in the first phase                                                 | 7.0 (3.2–15.4)   | <0.001  |             |       |       |
| <b>Model 2</b>                                                               |                  |         | 0.762       | 162.7 | 153.5 |
| No spot sign (reference)                                                     | 1.0              |         |             |       |       |
| Spot sign first appearing in the first phase                                 | 10.9 (4.5–26.8)  | <0.001  |             |       |       |
| Spot sign first appearing in the second or third phase                       | 5.5 (1.8–16.6)   | 0.003   |             |       |       |
| <b>Model 3</b>                                                               |                  |         | 0.767       | 167.3 | 155.2 |
| No spot sign (reference)                                                     | 1.0              |         |             |       |       |
| Spot sign first appearing in the first phase with volume <19.7 $\mu$ L       | 9.0 (3.1–26.5)   | <0.001  |             |       |       |
| Spot sign first appearing in the first phase with volume $\geq$ 19.7 $\mu$ L | 13.3 (4.4–40.0)  | <0.001  |             |       |       |
| Spot sign first appearing in the second or third phase                       | 5.5 (1.8–16.6)   | 0.003   |             |       |       |
| <b>Model 4</b>                                                               |                  |         | 0.765       | 162.1 | 153.0 |
| No spot sign (reference)                                                     | 1.0              |         |             |       |       |
| Spot sign with positive leakage rate between phases                          | 6.8 (2.8–16.6)   | <0.001  |             |       |       |
| Spot sign with negative leakage rate between any phases                      | 15.2 (4.9–47.1)  | <0.001  |             |       |       |
| <b>Model 5*</b>                                                              |                  |         | 0.743       | 80.4  | 76.3  |
| Absolute leakage rate (per 1- $\mu$ L/sec increase)                          | 1.32 (1.05–1.66) | 0.019   |             |       |       |

Only patients who underwent follow-up imaging by CT (n = 154). Hematoma growth is defined as >6 mL increase in volume of hematoma from baseline. \*Model 5 includes only patients with spot sign (n = 62). Abbreviations: AIC, Akaike information criterion; BIC, Bayesian information criterion.

**Table S4.** Logistic regression analysis of spot sign parameters for mRS  $\geq 3$  at 90 days

|                                                                                  | OR (95% CI)      | P value | C-Statistic | BIC   | AIC   |
|----------------------------------------------------------------------------------|------------------|---------|-------------|-------|-------|
| <b>Model 1</b>                                                                   |                  |         | 0.583       | 211.7 | 205.7 |
| No spot sign in the first phase (reference)                                      | 1.0              |         |             |       |       |
| Spot sign in the first phase                                                     | 2.8 (1.2–6.7)    | 0.019   |             |       |       |
| <b>Model 2</b>                                                                   |                  |         | 0.616       | 213.1 | 204.0 |
| No spot sign (reference)                                                         | 1.0              |         |             |       |       |
| Spot sign first appearing in the first phase                                     | 3.1 (1.3–7.5)    | 0.010   |             |       |       |
| Spot sign first appearing in the second or third phase                           | 4.0 (0.8–19.5)   | 0.084   |             |       |       |
| <b>Model 3</b>                                                                   |                  |         | 0.628       | 213.4 | 201.2 |
| No spot sign (reference)                                                         | 1.0              |         |             |       |       |
| Spot sign first appearing in the first phase with volume <19.7 $\mu\text{L}$     | 1.7 (0.6–4.5)    | 0.316   |             |       |       |
| Spot sign first appearing in the first phase with volume $\geq 19.7 \mu\text{L}$ | 13.4 (1.7–105.2) | 0.013   |             |       |       |
| Spot sign first appearing in the second or third phase                           | 4.0 (0.8–19.5)   | 0.084   |             |       |       |
| <b>Model 4</b>                                                                   |                  |         | 0.622       | 211.6 | 202.5 |
| No spot sign (reference)                                                         | 1.0              |         |             |       |       |
| Spot sign with positive leakage rate between phases                              | 2.5 (1.0–6.0)    | 0.048   |             |       |       |
| Spot sign with negative leakage rate between any phases                          | 6.7 (1.5–30.8)   | 0.084   |             |       |       |
| <b>Model 5*</b>                                                                  |                  |         | 0.673       | 52.1  | 48.4  |
| Absolute leakage rate (per 1- $\mu\text{L}/\text{sec}$ increase)                 | 1.37 (0.9–2.0)   | 0.124   |             |       |       |

Only patients in whom outcome data was available ( $n = 155$ ). Hematoma growth is defined as  $>6 \text{ mL}$  increase in volume of hematoma from baseline. \*Model 5 includes only patients with spot sign ( $n = 47$ ). Abbreviations: AIC, Akaike information criterion; BIC, Bayesian information criterion.



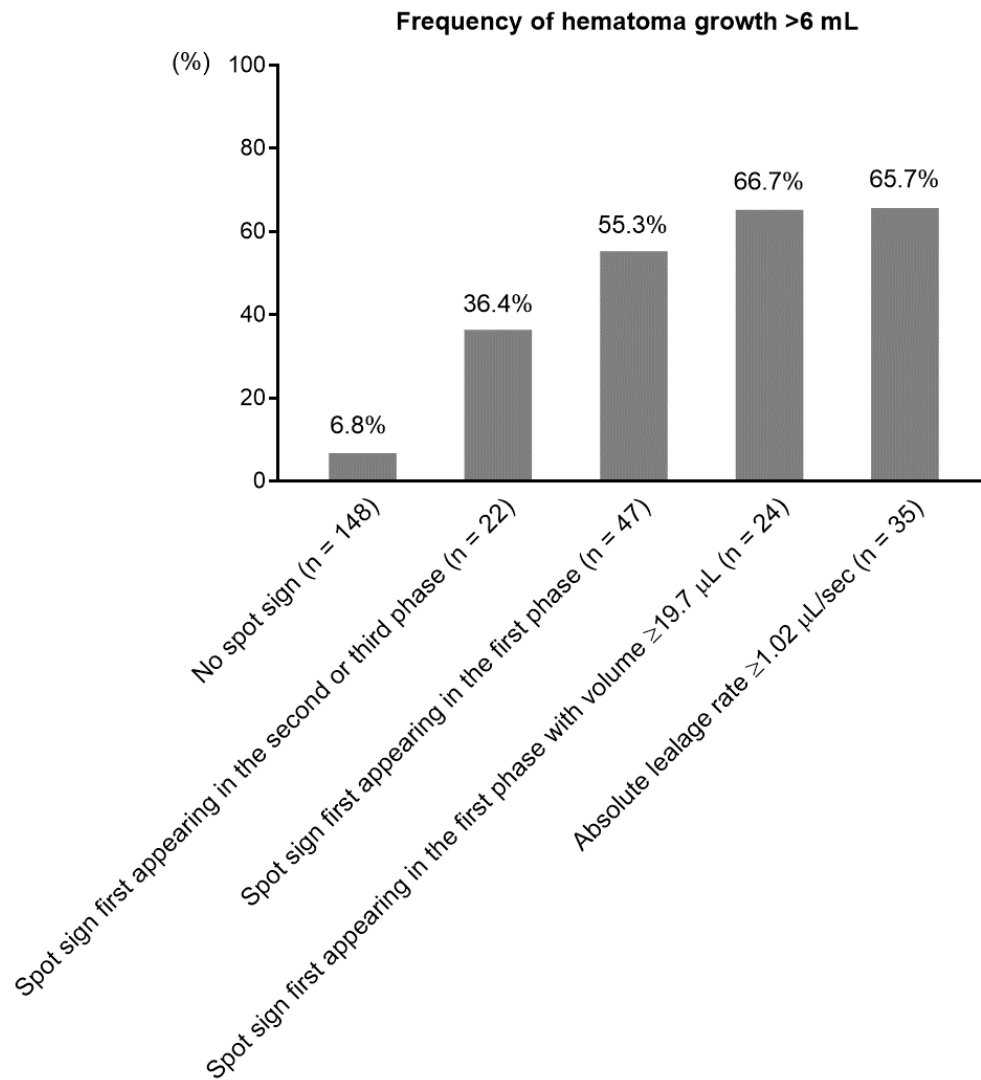

**Figure S1.** The frequency of hematoma growth by spot sign parameter  
Spot sign parameters were separated by more than or equal to median.
